# Supplementary material for: Facile fabrication of amphiphobic surfaces on copper substrates with a mixed modified solution
Source: Royal Society of Chemistry journal article supplement (doi:10.1039/c9ra02688f), 2019-01-01
Supplement: c9ra02688f1.pdf [file c9ra02688f1.pdf]

Supporting Information for

**Facile fabrication of amphiphobic surfaces on copper substrates with a mixed  
modified solution**

*Ning Wang, Qing Wang\**, Shuangshuang Xu, Xu Zheng and Mingya Zhang  
Institute of NanoEngineering, College of Civil Engineering and Architecture,  
Shandong University of Science and Technology, Qingdao 266590, China.  
E-mail: [qwang@sdust.edu.cn](mailto:qwang@sdust.edu.cn).

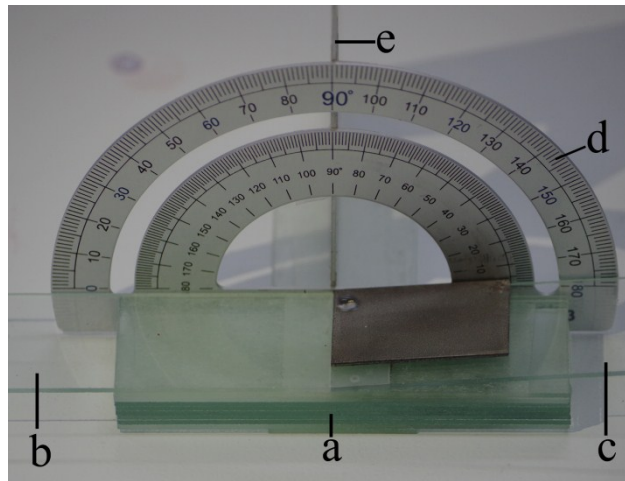

**Figure S1†.** Photograph of the home-made WSA measurement equipment.

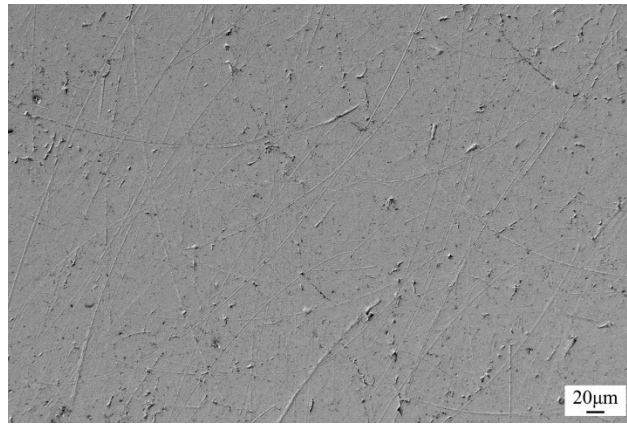

**Figure S2†.** SEM image of the bare copper substrate.

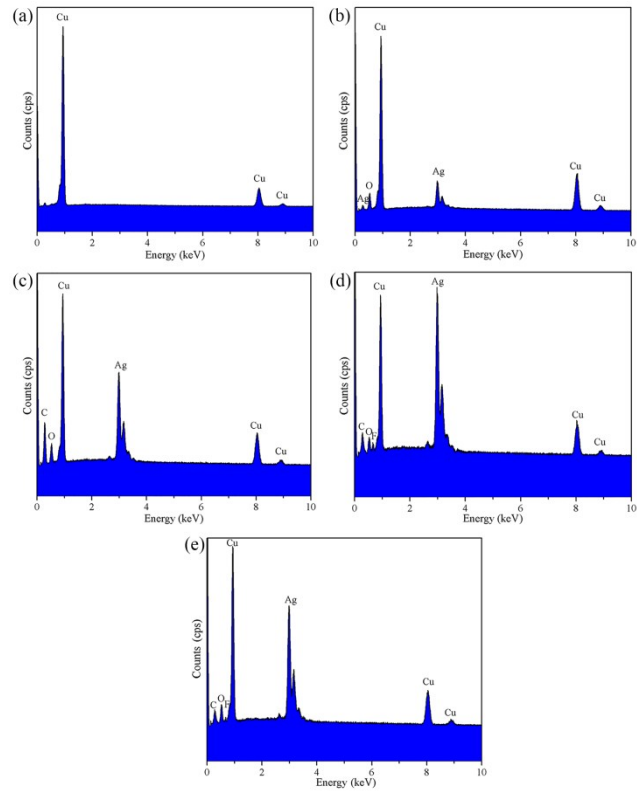

**Figure S3†.** EDS spectrum of (a) polished Cu substrate, (b) Ag@Cu surface, (c) STA@Ag@Cu surface, (d) PFOA@Ag@Cu surface, (e) STA&PFOA@Ag@Cu surface.

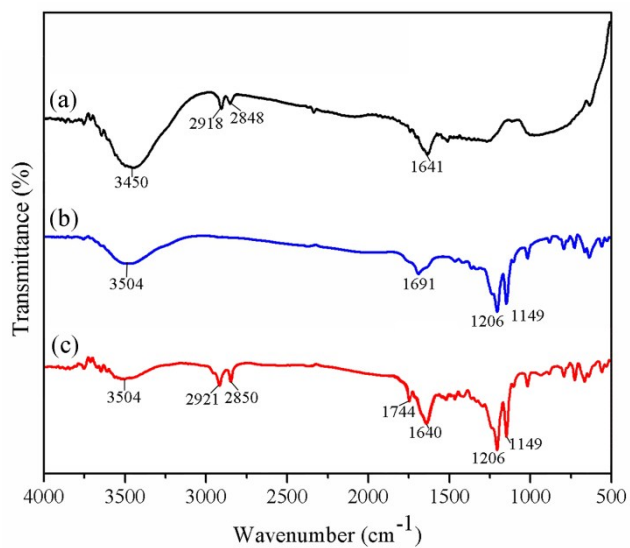

**Figure S4†.** FT-IR spectra of (a) STA@Ag@Cu surface, (b) PFOA@Ag@Cu surface, (c) STA&PFOA@Ag@Cu surface.

Figure S1† exhibits the photograph of the home-made WSA measurement equipment. Figure S2† demonstrates the morphology of the bare copper substrate. Figure S3† shows the chemical composition of different samples. Figure S4† is the FT-IR spectra of STA@Ag@Cu surface, PFOA@Ag@Cu surface and STA&PFOA@Ag@Cu surface.

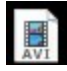

Video S1†.avi

**Video S1†.** Measurement process of WSA for the amphiphobic surface.

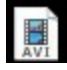

Video S2†.avi

**Video S2†.** Adhesion of water droplets for the Cu@Ag@PFOA surface.

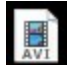

Video S3†.avi

**Video S3†.** Self-cleaning progress for the amphiphobic surface.

Videos S1† exhibits the measurement process of WSA for the as-fabricated amphiphobic surface. Videos S2† demonstrates the adhesion of water droplets for the Cu@Ag@PFOA surface. Videos S3† shows the entire process to clean up the white chalk power on the as-fabricated amphiphobic surface.

**Table S1†** The trend of WCA and OCA with the increase of reaction time from 5 to 15 min under the same PFOA content

| $M_F$ [%] | WCA[°] | OCA[°] |
|-----------|--------|--------|
| 0         | 1.8    | 3.0    |
| 20        | 1.6    | 57.5   |
| 40        | 5.1    | 7.3    |
| 60        | 3.9    | 15.3   |
| 80        | 3.4    | 2.8    |
| 100       | 2.0    | 3.6    |

**Table S2†** The trend of WCA and OCA with the increase of  $M_F$  from 0 to 100% under the same reaction time

| time [min] | WCA[°] | OCA[°] |
|------------|--------|--------|
| 5          | 8.7    | 92.1   |
| 10         | 8.4    | 91.3   |
| 15         | 8.5    | 92.7   |
| 20         | 6.3    | 93.5   |

Table S1† exhibits the trend of WCA and OCA with the increase of reaction time from 5 to 15 min under the same PFOA content. Table S2† exhibits the trend of WCA and OCA with the increase of  $M_F$  from 0 to 100% under the same reaction time.
